# Supplementary material for: Healthcare Resource Consumption and Related Costs in Patients on Antiretroviral Therapies: Findings from Real-World Data in Italy
Source: MDPI journal article supplement (doi:10.3390/ijerph20053789), 2023-02-21
Supplement: s1 [file s1]

## Supplementary materials

**Table S1.** Codes used for comorbidities identification.

| Comorbidity            | Codes                                                                                                       |
|------------------------|-------------------------------------------------------------------------------------------------------------|
| Depression             | at least one prescription for ATC code: N06A                                                                |
| Respiratory disease    | at least one prescription for ATC code: R03 or<br>at least a hospitalization with ICD-9-CM code:<br>460-519 |
| Renal failure          | at least a hospitalization with ICD-9-CM code:<br>584-586                                                   |
| Alcohol/drugs abuse    | at least a hospitalization with ICD-9-CM code:<br>303-304 or active exemption code 014                      |
| Cardiovascular disease | at least a hospitalization with ICD-9-CM code:<br>410-414, 431, 430, 432-438, 440, 443                      |
| Diabetes               | at least one prescription for ATC code: A10                                                                 |
| Dyslipidemia           | at least one prescription for ATC code: C10                                                                 |
| HBV/HCV                | at least a hospitalization with ICD-9-CM code:<br>070.2, 070.3, 070.7 or active exemption code<br>016       |
| Hypertension           | at least one prescription for ATC code: C02,<br>C03, C07, C08, C09                                          |

**Table S2.** Healthcare resources consumption in patients with TAF-based regimen during first year of follow-up by: **(A)** year of inclusion (2017-2018-2019), **(B)** persistence, **(C)** adherence (PDC >95%) and **(D)** non-adherence (PDC<80% in patients treated with ART- vs TAF-based regimens).

| <b>A. Year of inclusion</b>          | <b>2017</b> | <b>2018</b> | <b>2019</b> |
|--------------------------------------|-------------|-------------|-------------|
| Patients, n                          | 43          | 639         | 479         |
| ART prescriptions                    | 8.0 ± 2.4   | 7.9 ± 2.5   | 7.7 ± 2.4   |
| HIV hospitalizations                 | 0.2 ± 0.5   | 0.1 ± 0.3   | 0.1 ± 0.4   |
| Number of other drugs                | 4.4 ± 5.0   | 3.8 ± 3.9   | 3.4 ± 4.0   |
| Other hospitalizations               | 0.1 ± 0.5   | 0.1 ± 0.4   | 0.1 ± 0.4   |
| Specialistic visits/diagnostic tests | 8.5 ± 7.6   | 6.7 ± 6.7   | 5.9 ± 7.6   |

| <b>B. Persistence</b> | <b>Non-persistent</b> | <b>Persistent</b> |
|-----------------------|-----------------------|-------------------|
| Patients, n           | 256                   | 939               |
| ART prescriptions     | 8.0 ± 3.1             | 7.7 ± 2.3         |
| HIV hospitalizations  | 0.1 ± 0.5             | 0.1 ± 0.3         |
| Number of other drugs | 4.3 ± 4.3             | 3.4 ± 3.9         |

|                                      |           |           |
|--------------------------------------|-----------|-----------|
| Other hospitalizations               | 0.2 ± 0.5 | 0.1 ± 0.4 |
| Specialistic visits/diagnostic tests | 8.1 ± 8.4 | 6.1 ± 6.8 |

| <b>C. Adherence</b>                  | <b>&lt;80%</b> | <b>81-95%</b> | <b>&gt;95%</b> |
|--------------------------------------|----------------|---------------|----------------|
| Patients, n                          | 100            | 252           | 843            |
| ART prescriptions                    | 5.3 ± 2.4      | 7.7 ± 2.5     | 8.0 ± 2.4      |
| HIV hospitalizations                 | 0.1 ± 0.6      | 0.1 ± 0.3     | 0.1 ± 0.3      |
| Number of other drugs                | 3.3 ± 4.4      | 3.5 ± 4.1     | 3.6 ± 3.9      |
| Other hospitalizations               | 0.2 ± 0.6      | 0.1 ± 0.5     | 0.1 ± 0.4      |
| Specialistic visits/diagnostic tests | 5.3 ± 7.0      | 6.4 ± 7.7     | 6.7 ± 7.1      |

| <b>D. Non-adherence (PDC &lt;80%)</b> | <b>ART, adherence &lt;80%</b> | <b>TAF, adherence &lt;80%</b> |
|---------------------------------------|-------------------------------|-------------------------------|
| Patients, n                           | 321                           | 100                           |
| ART prescriptions                     | 6.3 ± 3.7                     | 5.7 ± 2.5                     |
| HIV hospitalizations                  | 0.1 ± 0.2                     | 0.1 ± 0.2                     |
| Number of other drugs                 | 2.1 ± 1.9                     | 2.3 ± 2.2                     |
| Other hospitalizations                | 0.1 ± 0.3                     | 0.1 ± 0.3                     |
| Specialistic visits/diagnostic tests  | 6.1 ± 10.0                    | 5.8 ± 7.0                     |

Data are reported as mean ± standard deviation.

**Table S3.** Generalized linear model (GLM) for predictors of mean annual non-ART healthcare costs (€) during first year of follow up for patients with TAF-based regimens.

|                          | <b>β (€)</b> | <b>95%CI</b> |         | <b>P value*</b> |
|--------------------------|--------------|--------------|---------|-----------------|
| <b>Age 35</b>            | <b>REF.</b>  |              |         |                 |
| Age 35-50 years          | 415.3        | -291.3       | 1,121.8 | 0.249           |
| Age 51-65 years          | 1,363.6      | 557.5        | 2,169.6 | <b>0.001</b>    |
| Age >65 years            | 2,265.2      | -260.6       | 4,791.0 | 0.079           |
| Male gender              | -62.0        | -675.1       | 551.2   | 0.843           |
| <b>Year 2017</b>         | <b>REF.</b>  |              |         |                 |
| Year 2018                | -1,229.3     | -4,141.3     | 1,682.7 | 0.408           |
| Year 2019                | -1829.8      | -4,731.9     | 1,072.3 | 0.217           |
| CCI                      | 1,733.8      | 195.7        | 3,271.8 | <b>0.027</b>    |
| <b>Adherence &lt;80%</b> | <b>REF.</b>  |              |         |                 |
| Adherence 81-95%         | -175.1       | -1,574.1     | 1,223.9 | 0.806           |
| Adherence >95%           | -664.3       | -1,913.6     | 585.0   | 0.297           |
| Constant                 | 3,373.9      | 81.1         | 6,666.7 | 0.045           |

CCI, Charlson Comorbidity Index.

\* Significant P values are in bold.
